# Supplementary material
Source: MDPI journal article supplement (https://www.mdpi.com/2311-553X/9/1/6)
Supplement: s1 [file s1]

A.

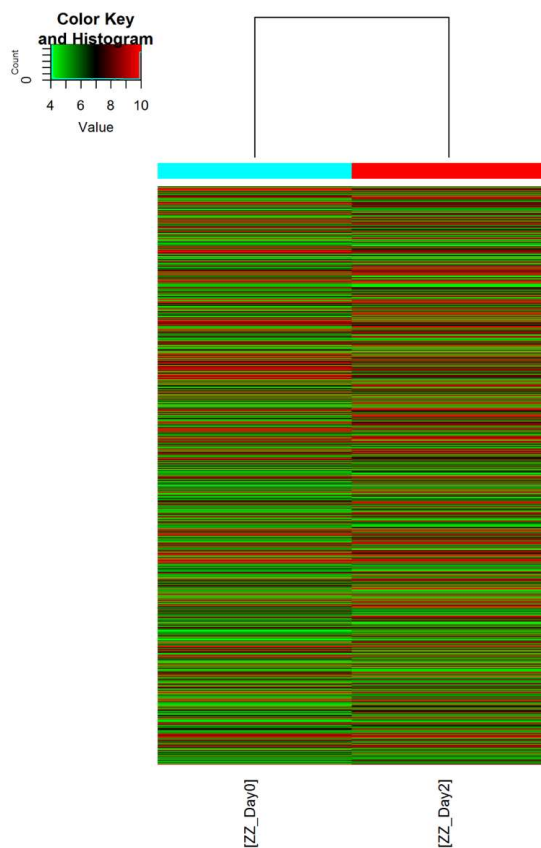

B.

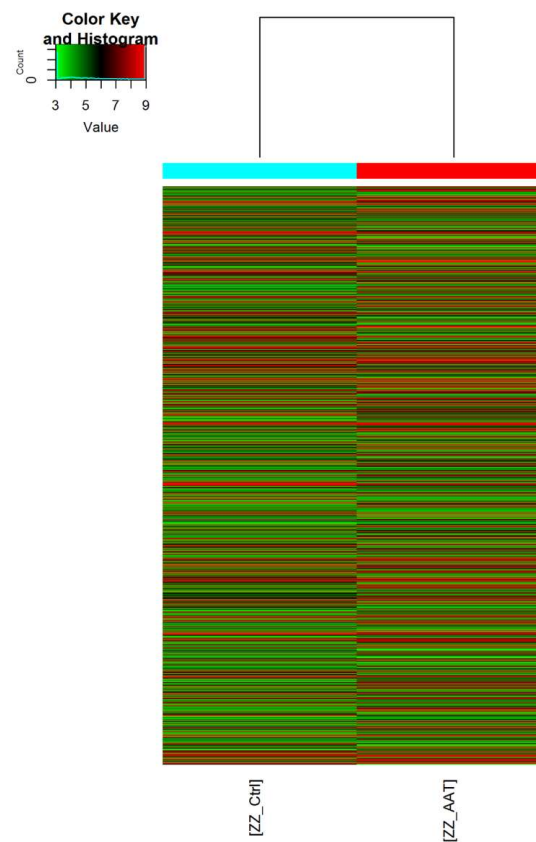

**Supplementary Figure S1.** Heat maps of lncRNA expression variation between (A) ZZ monocytes isolated 48 hours post AAT augmentation therapy (ZZ\_Day 2) and ZZ monocytes from untreated individuals ZZ\_(Day 0), and (B) ZZ monocytes treated ex vivo with 27.5  $\mu$ M AAT for 4 hours (ZZ\_AAT) and untreated control ZZ monocytes (ZZ\_Ctrl).
